# Supplementary material
Source: publisher figshare collection journal article supplement (https://karger.figshare.com/ndownloader/files/6568560)
Supplement: Supplementary file 1 [file 6568560]

**Supplementary Tables and Figure Headings**

**Supplementary Table S1.**

**219 SNPs identified in the *RTN1* region (AA T2D-ESKD Discovery)**

**Supplementary Table S2.**

***RTN1* SNPs associated with T2D-ESKD in AA Discovery Study**

**Supplementary Table S3.**

**Hardy-Weinberg Equilibrium for variants tested in AA T2D-ESKD studies**

**Figure Legend:**

**Supplementary Figure S1.**

**LD block (D’) of 219 SNP *RTN1* gene region used in the African American Discovery study**
